# Supplementary material for: On the Equivalence of the Biological Effect Induced by Irradiation of Clusters of Heavy Atom Nanoparticles and Homogeneous Heavy Atom-Water Mixtures
Source: MDPI journal article supplement (doi:10.3390/cancers13092034), 2021-04-23
Supplement: s1 [file s1]

## Supplementary Material

Here we explore the *%Diff* at the physical stage between a cluster of GNPs and an heterogeneous MixNP, modelled as a two concentric spheres as shown in Fig. S1, where the gold/water mixture is surrounded by water cell.

The setting of the properties of the inner sphere for the heterogeneous MixNP were set *a posteriori*, by sampling it's density and radius, and choosing the parameters that minimizes the *%Diff* of the Radial Dose Distributions (RDDs) with respect to the GNPs cluster. The best set of parameters are shown in Table S1. Using those values, the DEF and *%Diff* for the all sizes of the heterogeneous MixNP are plotted in Fig. S2.

To show the drastic improvement on the *%Diff* by the hereogenous MixNP, Fig. S3 shows a comparison of the *%Diff* between a full GNPs cluster versus the homogeneous and heterogeneous MixNP.

**Table S1.** Set of optimized parameters used to model the heterogeneous MixNP for all sizes.

| MixNP size (nm) | Density (g/cm3) | Core radius (nm) |
|-----------------|-----------------|------------------|
| 70              | 8.767           | 64               |
| 250             | 7.895           | 240              |
| 500             | 7.9             | 480              |

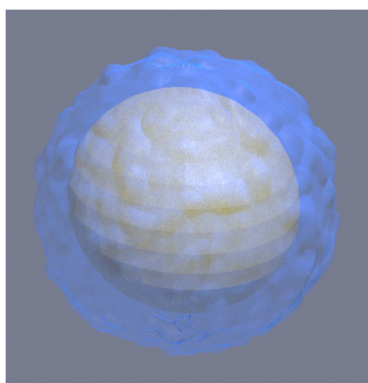

**Figure S1.** Visualization of the heterogeneous MixNP, showing a water cell surrounding an homogeneous mixture of gold and water.

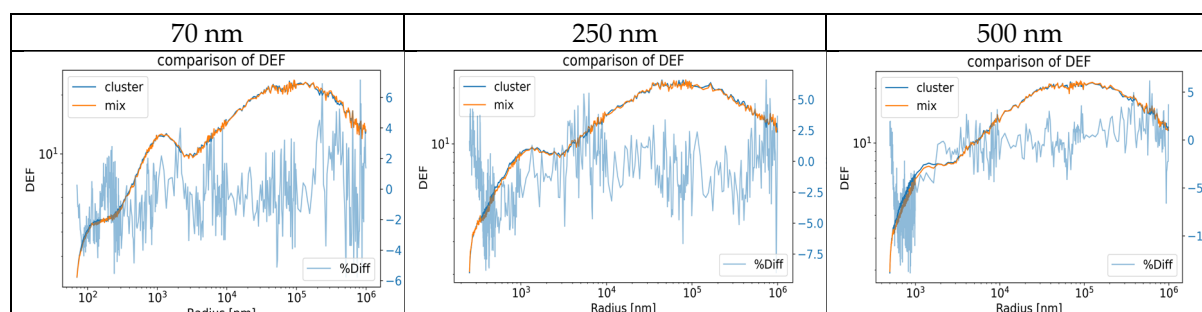

**Figure S2.** DEF and *%Diff* (blue) between the cluster and the heterogeneous MixNP for all sizes.

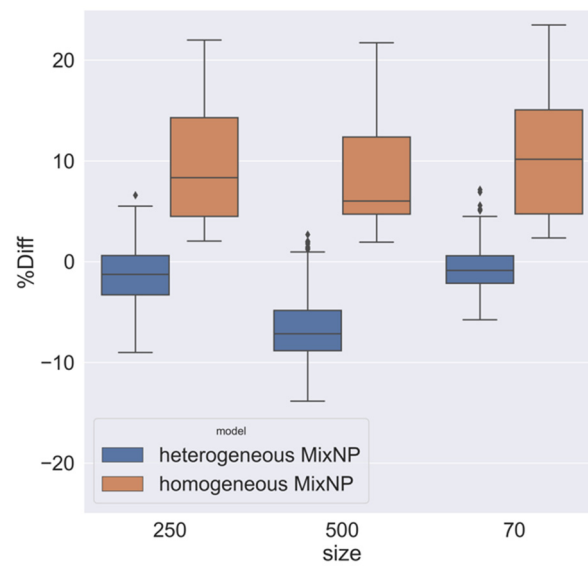

**Figure S3.** Boxplot comparing the %Diff between the cluster and the heterogenous/homogeneous MixNP for all sizes.
